# Supplementary material for: Cloning and Heterologous Expression of the Grecocycline Biosynthetic Gene Cluster
Source: PubMed Central journal article supplement (PMC4943663; doi:10.1371/journal.pone.0158682), 2016-07-13
Supplement: pone.0158682.s003.pdf [file pone.0158682.s003.pdf]

**S1 Table. Oligonucleotides used in this study**

| <b>Primer</b>   | <b>Sequence (5'→ 3')</b>                                            | <b>Restriction site</b> |
|-----------------|---------------------------------------------------------------------|-------------------------|
| 15aSOKf         | CACAACATACGAGCCGGAAGCTCTACTAGAGTCAC<br>ACTGGCTCACCTTCGGG            | -                       |
| 15aSOKr         | GATGGAGCTGCACATGAACCGGGCTGACTTCAGGTG<br>CTACATTTGAAGAGATAAATTGCACTG | -                       |
| SOK15af         | GGTTCATGTGCAGCTCCATCAGC                                             | -                       |
| SOK15ar         | GCTTCCGGCTCGTATGTTGTGTGG                                            | -                       |
| CEN_LEUf        | GCCTCCGACTAACCACCTGGGTCCTTTTCATCACGT<br>GCTAT                       | -                       |
| CEN_LEUr        | CGAAGAGCGATTGAGCTGATAGACGGTTTTTCGCCC<br>TTGAC                       | -                       |
| CL9Lf           | GGCGAAAACCGTCTATCAGCTCAATCGCTCTTCGT<br>TCGTCTGGAAGGC                | -                       |
| CL9Lr           | CGTGATGAAAAGGACCCAGGTGGGTTAGTCGGAGG<br>CCAAACGGC                    | -                       |
| CLYbacf         | TATTGACATGTCGTCGATTTTCAGTGCAATTTATCTCT<br>TCAAATG                   | -                       |
| CLYbacR         | GAAATAAGATCACTACCGCACTTGGTGCACGCAGA<br>G                            | -                       |
| BACclyf         | GCGTGCACCAAGTGCGGTAGTGATCTTATTTTCATTA<br>TGGTGAAAGTTGG              | -                       |
| BACclyr         | GATAAATTGCACTGAAATCGACGACATGTCAATACT<br>TGCCC                       | -                       |
| greTH-fF-SspI-f | TTTAATATTCGTGCACGGGCGGACGGTGTT <sup>a</sup>                         | <i>SspI</i>             |
| greTH-fR-MCS-r  | TTTAATATTAAGCCGCCGCCGAGGACG <sup>a</sup>                            | <i>SspI</i>             |
| greTH-fF-fus-r  | CGGCGGGGGAAAGGCTTATGGATATCTTCCGAGCC<br>TCCGTTGGGTG <sup>a</sup>     | <i>EcoRV</i>            |
| greTH-fR-fus-f  | CACCCAACGGAGGCTCGGAAGATATCCATAAGCCT<br>TTCCCCGCCG <sup>a</sup>      | <i>EcoRV</i>            |
| greGT1-fR-f     | CAGCACCGTACGGAGGCCTGAGATATCGCGGCACG                                 | <i>EcoRV</i>            |

---

|                   |                                                                            |              |
|-------------------|----------------------------------------------------------------------------|--------------|
| (fuz)             | CCCGGACGGCCGG <sup>a</sup>                                                 |              |
| greGT1-fF-f       | CCCA <b>ATATT</b> CCGGCCCCGTTCCCCCTGACCG <sup>a</sup>                      | <i>SspI</i>  |
| greGT1-fF-r (fuz) | CCGGCCGTCCGGGCGTGCCGCG <b>ATATCTC</b> AGGCCTC<br>CGTACGGTGCTG <sup>a</sup> | <i>EcoRV</i> |
| greGT1-fR-r       | CCCA <b>ATATT</b> GATCCGGAAGGCTCCAGGTCC <sup>a</sup>                       | <i>SspI</i>  |
|                   | TGGGCTGCAGGTCTGACTCTAGAGGATCCGCGGCCGC                                      |              |
| pCLY10-Gre-st     | GCCCCCGGATGGCGCGGCTGTGTGGTGCTTCAAAG                                        | -            |
|                   | TGGC                                                                       |              |
|                   | TCGCGCCCTCCATGAGGCGTACCCGAAGTTCACCGA                                       |              |
| pCLY10-Gre-end    | AGGTCGGACGCCGGGCCCCGGCCCGTCGATGCGCG                                        | -            |
|                   | GCGGG                                                                      |              |
| greR1-f           | GTGTGGTGCTTCAAAGTGGC                                                       | -            |
| greR1-r           | GCCCCGGGCGGTGCTCACTG                                                       | -            |
| greR3-f           | AGGGACCACCCCGTGAAAGC                                                       | -            |
| greR3-r           | AAGCTTTATGTGCTCATGCC                                                       | -            |
| greR2.1-f         | GGAGACCCGCCGGGTCCTGAT                                                      | -            |
| greR2.1-r         | GGAACACGTTGATCATTTCGT                                                      | -            |
| greR2.2-f         | CGGACTCCCACACGAGAGGAA                                                      | -            |
| greR2.2-r         | GCCCTTCTCCACACGGATGGT                                                      | -            |
| greR1-R2.1-f      | GTGGCCAACAACCCCGGCGCC                                                      | -            |
| greR1-R2.1-r      | TAGAGGGTCAGCAGCGCCACC                                                      | -            |
| greR2.1-.2.2-f    | CGGCTCGCCGAAGGAGCCCGA                                                      | -            |
| greR2.1-2.2-r     | GGTGCCTTCGACGGTGGAGGC                                                      | -            |
| greR2.2-R3-f      | ACTGGGCGGCGGAGCCCTGTG                                                      | -            |
| greR2.2-R3-r      | GGCGCCGGTGCGTTCCCGCAG                                                      | -            |

<sup>a</sup> – restriction sites introduced artificially are marked in bold

---
