# Supplementary material for: Cloning and Heterologous Expression of the Grecocycline Biosynthetic Gene Cluster
Source: PubMed Central journal article supplement (PMC4943663; doi:10.1371/journal.pone.0158682), 2016-07-13
Supplement: pone.0158682.s004.pdf [file pone.0158682.s004.pdf]

**S2 Table. Oligonucleotides used for sequencing pGRE**

| <b>Primer</b> | <b>Sequence (5'→ 3')</b> |
|---------------|--------------------------|
| gre-seq-51.2  | AGACGGTCACGGACAACCTGC    |
| gre-seq-50.2  | ATTCTGCTGGTCGTCTTCGGT    |
| gre-seq-49.2  | TAACTCATGGGTAAGCCCTTA    |
| gre-seq-46.2  | GGTGTACGTCGAAGGTGTTGA    |
| gre-seq-43.2  | TATGTGCAGATGCAGCAGGTC    |
| gre-seq-41.2  | AACCGTGGATGTACGAGAAGG    |
| gre-seq-39.2  | AGCTGTACTTGGCCGACATCC    |
| gre-seq-36.2  | AACTCTGTTCACTGCAAGCCG    |
| gre-seq-35.2  | TCAACTCCCTCACCCAGCACG    |
| gre-seq-34.2  | AACTACACCAAGGTCCACAAA    |
| gre-seq-33.2  | AACTCACCAACAGCGACATCA    |
| gre-seq-27.2  | GGGTGATCGGCAACGACATCA    |
| gre-seq-24.2  | AAGAACGCCATCGACTGGTTC    |
| gre-seq-23.2  | AGAACTCCAAGGTCAGCAGCA    |
| gre-seq-18.2  | GCTCATCAGCAGGTTCTCTT     |
| gre-seq-12.2  | AACATCACCATCAACAGCGTG    |
| gre-seq-7.1   | TCATCGACACGAACCTCAACA    |
| gre-seq-4.1   | TGGCCATGAAGCACACGTGG     |
| gre-seq-1     | ATCCGGTTGGTGTGTGATGTT    |
| gre-seq-2     | ATAGCTTGCCAGGAGCAGTTC    |
| gre-seq-3     | CGACGATGGGGCTCGACCAGG    |
| gre-seq-4     | GGTCGGGCACTCTCTGGGCGC    |
| gre-seq-5     | CCAGCGGAGTGGTCGTCAGCG    |
| gre-seq-6     | CCGCGGCCACGGCGGCTTCAA    |
| gre-seq-7     | CTGGTCAACAATGCGGGCCGC    |
| gre-seq-8     | GTGAGAAGGACGAACGCATCC    |
| gre-seq-9     | GCCGGTGTGCCGAGGCCAGG     |
| gre-seq-10    | CCGGCGCTTCGAACGGCTGGA    |
| gre-seq-11    | GGCCTGCTGCTGAACATCTCC    |
| gre-seq-12    | TCTTCATCATCCAGAGGGCGC    |
| gre-seq-13    | GCTTCGGCGGACTGCTGCTGT    |

---

|            |                        |
|------------|------------------------|
| gre-seq-14 | GATCCGCTCGGCGCTGGGGGC  |
| gre-seq-15 | GGAACGACGGCGGGCCGCTTC  |
| gre-seq-16 | CGCCACCGAGATCCAGCACCA  |
| gre-seq-17 | GACCGCTCGGACGACCCCGCC  |
| gre-seq-18 | TCCTGATCCGCTCCCTGGCCAT |
| gre-seq-19 | GCACGGGCACCCGGCGGCACC  |
| gre-seq-20 | GGCGGGATGCGAGCGGGCTAT  |
| gre-seq-21 | CATTCTGGAGGAGTGCCTCA   |
| gre-seq-22 | CAGGCGCGGCTGCGAGGTCCT  |
| gre-seq-23 | CCCCTGCGGGACGTGCTGTCC  |
| gre-seq-24 | ACGCCGATCCGGCGACGGAGG  |
| gre-seq-25 | GAGATGGAGGACGCCAACGCC  |
| gre-seq-26 | CGCCCCGGCGCGACCCGGACG  |
| gre-seq-27 | ACGCCGAACTCGCCGCGAGGG  |
| gre-seq-28 | CCCGGCAGATCAACTACTCCG  |
| gre-seq-29 | TCACCTACATCCCCCAGGACA  |
| gre-seq-30 | CGTCCTGGACGGTGCCATGAT  |
| gre-seq-31 | CCGAGAAGCTGATCCCGCTCT  |
| gre-seq-32 | GGCTCCTCGGCCAACCTGCTC  |
| gre-seq-33 | GGCTGCGGGAGGGACTGGACG  |
| gre-seq-34 | GCCAAGGAGTTCGGCGGCGTC  |
| gre-seq-35 | TCCTCGACACCGTGGAGCTGG  |
| gre-seq-36 | CTCATGGAGAACGTGATGTTC  |
| gre-seq-37 | CGGCGCTCGCCGCTGTCCTGC  |
| gre-seq-38 | GCTGCACTACGCCAAGTACCT  |
| gre-seq-39 | GCCACCGGCCCCACCGCGCCC  |
| gre-seq-40 | CGGCATGGTCTCCGGCCTCGA  |
| gre-seq-41 | GCTGGCGCCCGGACGTCGTGG  |
| gre-seq-42 | CCAGGAACTCCTGTCTGAATCC |
| gre-seq-43 | GCCCCGGTGCTCGCGAAGTTC  |
| gre-seq-44 | CGGAGGCCTGATGCGCGTCCT  |
| gre-seq-45 | ACCCTCGCCCTCAACGGCGTA  |
| gre-seq-46 | CCCGGAGACGGCCCGCCGTCC  |
| gre-seq-47 | ACGCCTTCACGGCGGACTGCC  |

---

---

|            |                       |
|------------|-----------------------|
| gre-seq-48 | CCGTGGCCGACGGGCCTCCTG |
| gre-seq-49 | AGTCTGTCGGGCTGTGCAGCC |
| gre-seq-50 | AAGGAGTTCGCCAAGGAGGGC |
| gre-seq-51 | GCCGGCTGCCGGCGGAGGCGG |

---
