# Supplementary material for: Cloning and Heterologous Expression of the Grecocycline Biosynthetic Gene Cluster
Source: PubMed Central journal article supplement (PMC4943663; doi:10.1371/journal.pone.0158682), 2016-07-13
Supplement: pone.0158682.s005.pdf [file pone.0158682.s005.pdf]

**S3 Table. PCR conditions used in this study**

---

| T °C                                                  | Time, min |   |    |
|-------------------------------------------------------|-----------|---|----|
| <b>PCR conditions for R1 and R3 amplification</b>     |           |   |    |
| 95.0                                                  | 03:00     |   |    |
| 94.0                                                  | 00:30     | } | 25 |
| 62.0                                                  | 00:20     |   |    |
| 68.0                                                  | 13:00     |   |    |
| 68.0                                                  | 10:00     |   |    |
| 4.0                                                   | -         |   |    |
| <b>PCR conditions for R2.1 and R2.2 amplification</b> |           |   |    |
| 98.0                                                  | 03:00     |   |    |
| 98.0                                                  | 00:30     | } | 25 |
| 61.5                                                  | 00:20     |   |    |
| 72.0                                                  | 05:00     |   |    |
| 72.0                                                  | 10:00     |   |    |
| 4.0                                                   | -         |   |    |
| <b>PCR conditions for pGRE assembly verification</b>  |           |   |    |
| 95.0                                                  | 02:00     |   |    |
| 95.0                                                  | 00:17     | } | 25 |
| 57.0                                                  | 00:15     |   |    |
| 72.0                                                  | 01:10     |   |    |
| 72.0                                                  | 05:00     |   |    |
| 4.0                                                   | -         |   |    |

---
